# Supplementary material
Source: HighWire-hosted journal article supplement (https://erj.ersjournals.com/content/57/3/2001519)
Supplement: inline-supplementary-material-1 [file inline-supplementary-material-1.pdf]

## **Appendix: Search terms used for each statement topic**

The specific search terms used for each of the statement topics are given below.

### *Equipment and technique:*

(Ultrasound OR ultrasonic OR echography OR sonographic OR sonography) AND (chest OR thoracic OR thorax OR lung OR lungs OR pulmonary) AND (protocol OR technique OR zone)

### *Chest wall and parietal pleura:*

(Ultrasound OR sonography) AND (chest OR thoracic OR thorax) AND (rib OR "parietal pleura")

### *Pleural effusion:*

(Ultrasound OR sonography OR echography) AND (pleural OR thorax OR thoracic OR chest OR intrathoracic OR endothoracic OR transthoracic) AND (fluid OR effusion OR liquid OR exudate OR transudate)

### *Pneumothorax:*

(Ultrasound OR ultrasonography) AND (pneumothorax OR pneumothorax)

### *Interstitial syndrome:*

(Ultrasound OR ultrasonic OR echography OR sonographic OR sonography) AND (chest OR thoracic OR thorax OR lung OR lungs OR pulmonary) AND (interstitial syndrome)

### *Lung consolidation:*

(Ultrasound OR Ultrasonic OR echography OR sonographic OR sonography) AND (chest OR thoracic OR thorax OR lung OR lungs OR pulmonary) AND (consolidation OR pneumonia OR pulmonary embolism OR contusion OR atelectasis)

### *Diaphragm:*

(Diaphragm) AND (ultrasound OR sonography)

### *US guided procedures:*

(Ultrasound OR US) AND (guided) AND (intervention OR procedure OR thoracentesis OR chest drain OR indwelling pleural catheter OR biopsy OR thoracoscopy) AND (lung OR pleural OR thoracic OR chest)

### *Training:*

(Ultrasound OR ultrasonic OR echography OR sonographic OR sonography) AND (chest OR thoracic OR thorax OR lung OR lungs OR pulmonic) AND (training OR education OR simulation OR (virtual reality) OR assessment OR test)

*Patient perspectives:*

((Ultrasound OR ultrasonography) AND (thorax OR respiratory OR lung OR chest) AND (patient) AND (preference OR experience OR satisfaction OR perspective))
