# Supplementary material
Source: HighWire-hosted journal article supplement (https://erj.ersjournals.com/content/57/3/2001519)
Supplement: inline-supplementary-material-2 [file inline-supplementary-material-2.pdf]

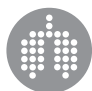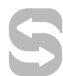

SHAREABLE PDF

# European Respiratory Society statement on thoracic ultrasound

Christian B. Laursen<sup>1,2</sup>, Amelia Clive<sup>3,4</sup>, Rob Hallifax<sup>5,6</sup>, Pia Iben Pietersen<sup>1,2,7</sup>, Rachelle Asciak<sup>5,6</sup>, Jesper Rømhild Davidsen<sup>1,2,8</sup>, Rahul Bhatnagar<sup>3,4</sup>, Eihab O. Bedawi<sup>5,6</sup>, Niels Jacobsen<sup>1,2,7</sup>, Courtney Coleman<sup>9</sup>, Anthony Edey<sup>10</sup>, Gabriele Via<sup>11</sup>, Giovanni Volpicelli<sup>12</sup>, Gilbert Massard<sup>13</sup>, Francesco Raimondi<sup>14</sup>, Matthew Evison<sup>15</sup>, Lars Konge<sup>16</sup>, Jouke Annema<sup>17</sup>, Najib M. Rahman<sup>5,6,18,19,20</sup> and Nick Maskell<sup>3,4,20</sup>

**Affiliations:** <sup>1</sup>Dept of Respiratory Medicine, Odense University Hospital, Odense, Denmark. <sup>2</sup>Dept of Clinical Research, Faculty of Health Sciences, University of Southern Denmark, Odense, Denmark. <sup>3</sup>Academic Respiratory Unit, University of Bristol, Bristol, UK. <sup>4</sup>Southmead Hospital, North Bristol NHS Trust, Bristol, UK. <sup>5</sup>Oxford Centre for Respiratory Medicine, Churchill Hospital, Oxford University Hospitals NHS Foundation Trust, Oxford, UK. <sup>6</sup>Oxford Respiratory Trials Unit, Nuffield Dept of Medicine, University of Oxford, Oxford, UK. <sup>7</sup>Regional Center for Technical Simulation, Odense University Hospital, Odense, Denmark. <sup>8</sup>South Danish Center for Interstitial Lung Diseases (SCILS), Odense University Hospital, Odense, Denmark. <sup>9</sup>European Lung Foundation, Sheffield, UK. <sup>10</sup>Dept of Radiology, Southmead Hospital, North Bristol NHS Trust, Bristol, UK. <sup>11</sup>Cardiac Anesthesia and Intensive Care, Cardiocentro Ticino, Lugano, Switzerland. <sup>12</sup>Dept of Emergency Medicine, Ospedale San Luigi Gonzaga, Torino, Italy. <sup>13</sup>Faculty of Science, Technology and Medicine, University of Luxembourg, Grand-Duchy of Luxembourg. <sup>14</sup>Division of Neonatology, Section of Pediatrics, Dept of Translational Medical Sciences, Università "Federico II" di Napoli, Naples, Italy. <sup>15</sup>Wythenshawe Hospital, Manchester University NHS Foundation Trust, Manchester, UK. <sup>16</sup>Copenhagen Academy for Medical Education and Simulation, The Capital Region of Denmark, Centre for HR, University of Copenhagen, Copenhagen, Denmark. <sup>17</sup>Dept of Respiratory Medicine, Amsterdam UMC, University of Amsterdam, Amsterdam, The Netherlands. <sup>18</sup>Laboratory of Pleural and Lung Cancer Translational Research, Nuffield Dept of Medicine, University of Oxford, Oxford, UK. <sup>19</sup>National Institute for Health Research, Oxford Biomedical Research Centre, University of Oxford, Oxford, UK. <sup>20</sup>Joint last authors.

**Correspondence:** Christian B. Laursen, Odense University Hospital, Dept of Respiratory Medicine, Sdr. Boulevard 29, Odense 5000, Denmark. E-mail: christian.b.laursen@rsyd.dk

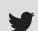

@ERSpublications

**Continued clinical use and research has established thoracic ultrasound as a key tool and skill for the modern pulmonologist** <https://bit.ly/3cCL6KS>

**Cite this article as:** Laursen CB, Clive A, Hallifax R, *et al.* European Respiratory Society statement on thoracic ultrasound. *Eur Respir J* 2021; 57: 2001519 [https://doi.org/10.1183/13993003.01519-2020].

This single-page version can be shared freely online.

**ABSTRACT** Thoracic ultrasound is increasingly considered to be an essential tool for the pulmonologist. It is used in diverse clinical scenarios, including as an adjunct to clinical decision making for diagnosis, a real-time guide to procedures and a predictor or measurement of treatment response. The aim of this European Respiratory Society task force was to produce a statement on thoracic ultrasound for pulmonologists using thoracic ultrasound within the field of respiratory medicine. The multidisciplinary panel performed a review of the literature, addressing major areas of thoracic ultrasound practice and application. The selected major areas include equipment and technique, assessment of the chest wall, parietal pleura, pleural effusion, pneumothorax, interstitial syndrome, lung consolidation, diaphragm assessment, intervention guidance, training and the patient perspective. Despite the growing evidence supporting the use of thoracic ultrasound, the published literature still contains a paucity of data in some important fields. Key research questions for each of the major areas were identified, which serve to facilitate future multicentre collaborations and research to further consolidate an evidence-based use of thoracic ultrasound, for the benefit of the many patients being exposed to clinicians using thoracic ultrasound.
